# Supplementary material for: Disaccharide-tag for highly sensitive identification of O-GlcNAc-modified proteins in mammalian cells
Source: PubMed Central journal article supplement (PMC9126400; doi:10.1371/journal.pone.0267804), 2022-05-23

All images were detected using Image Quant LAS4000 (GE healthcare) and ECL Western blotting detection reagent (GE Healthcare) as a substrate.

**Fig 1A left**

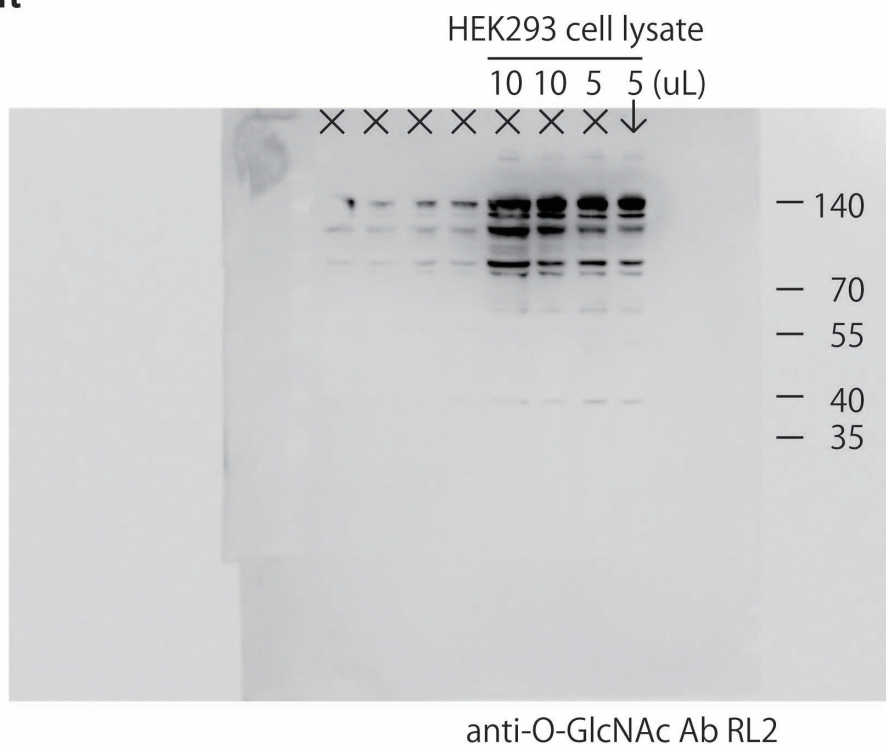

**Fig 1A right**

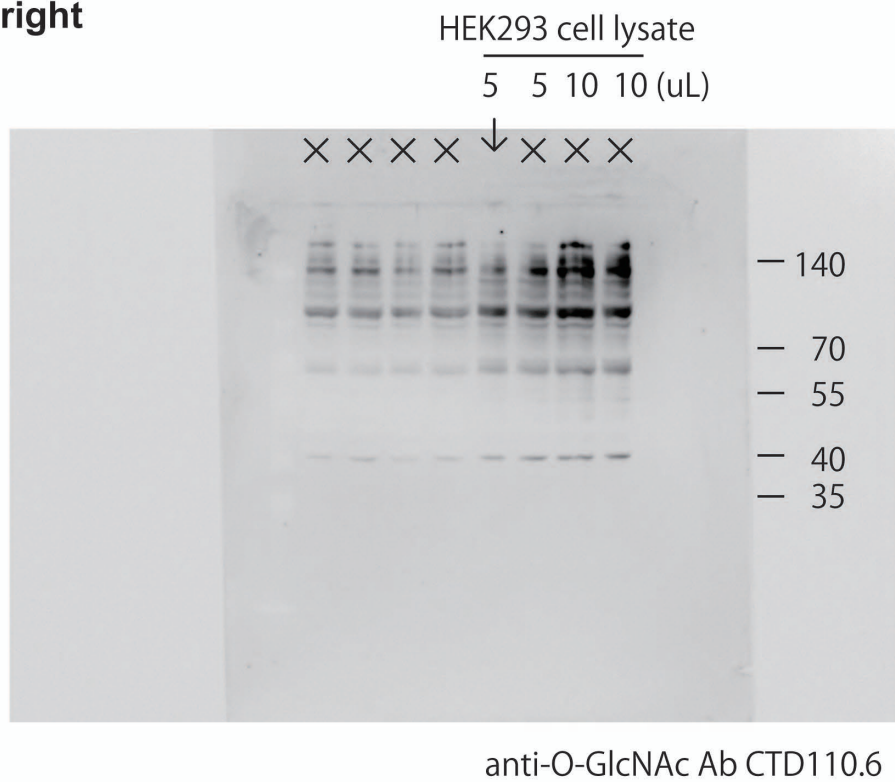

HEK293 cell lysate

**Fig 1B upper left**

anti-O-GlcNAc Ab RL2

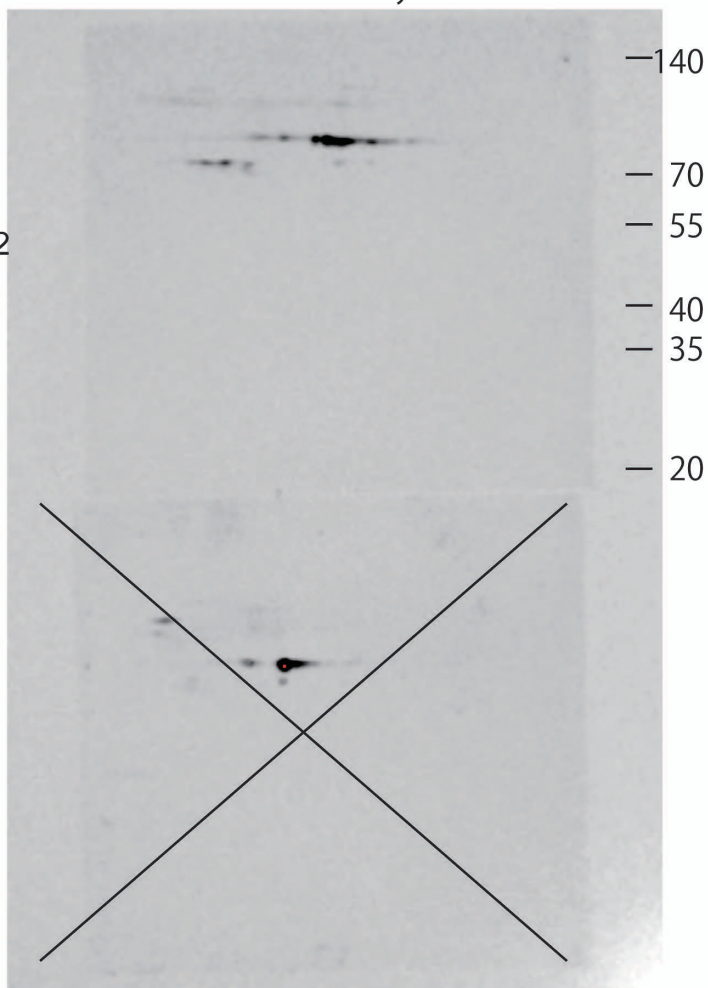

**Fig 1B upper right**

HEK293 cell lysate

wheat germ agglutinin  
(WGA)

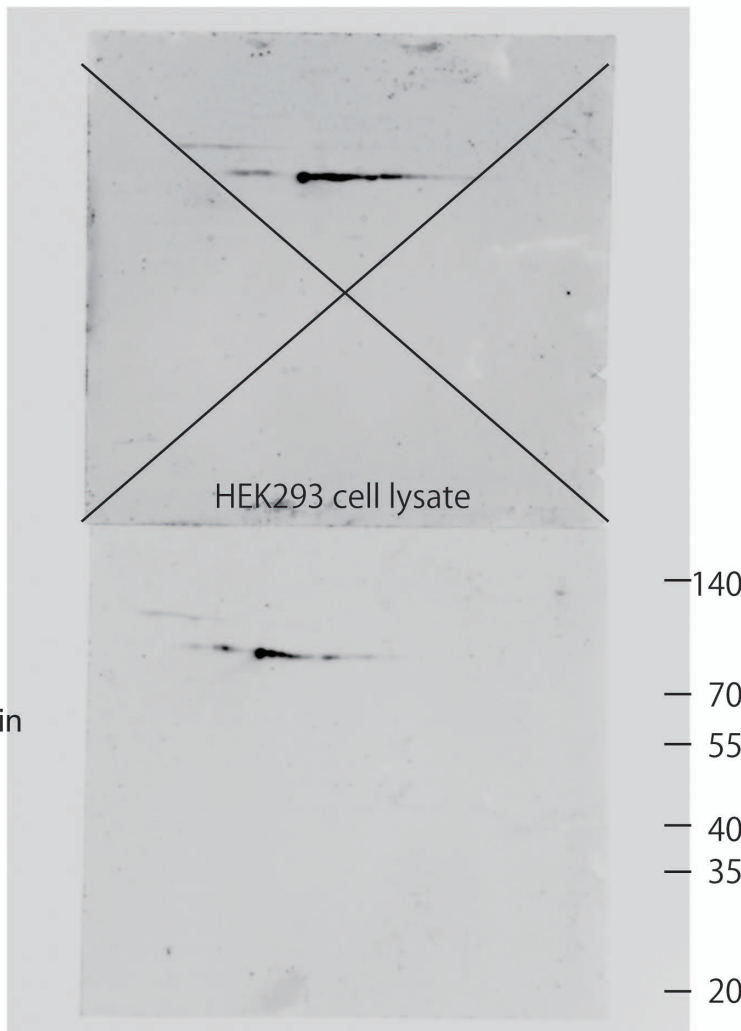

**Fig 1B lower left**

HEK293 cell lysate  
( $\beta$ GalNAc-T expressed)

*Wisteria japonica*  
agglutinin (WJA)

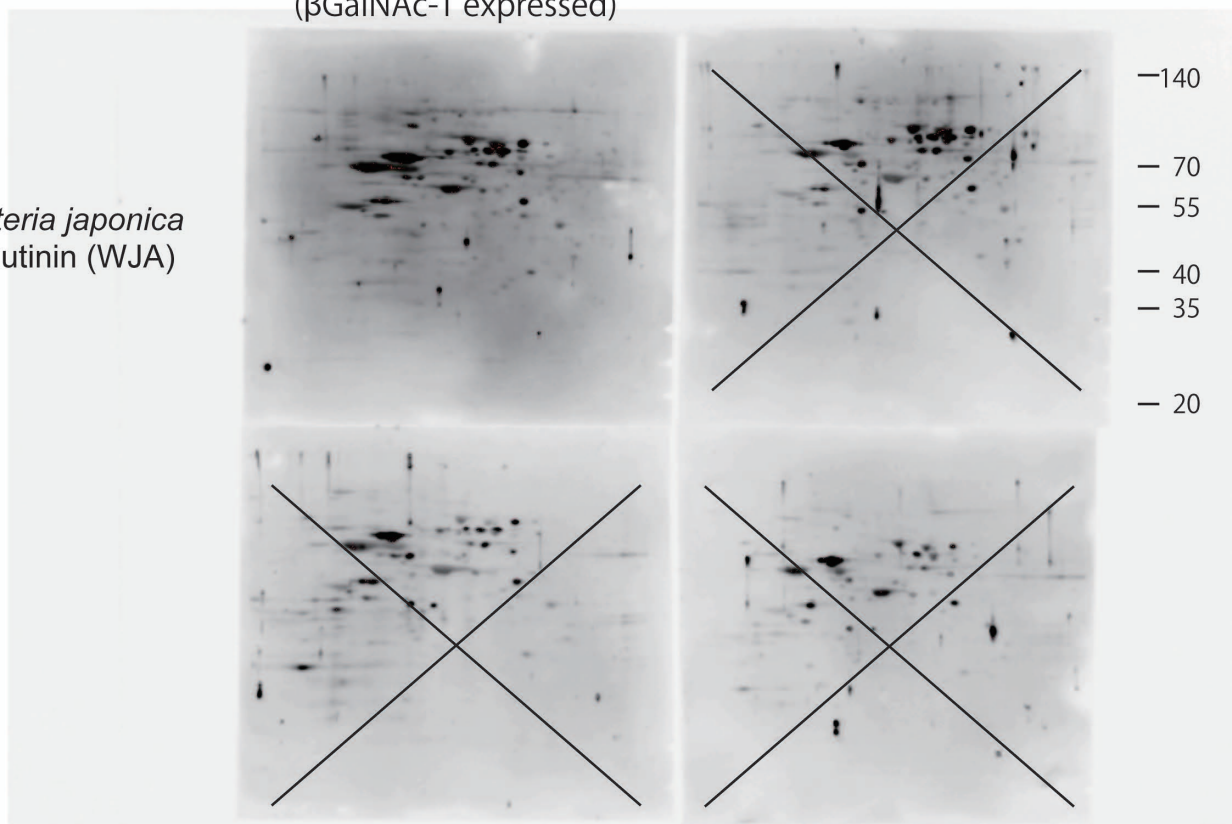

**Fig 2B**

purified proteins

FLAG- c-Rel    FLAG-  
 $\beta$ GalNAc-T

anti-FLAG Ab staining

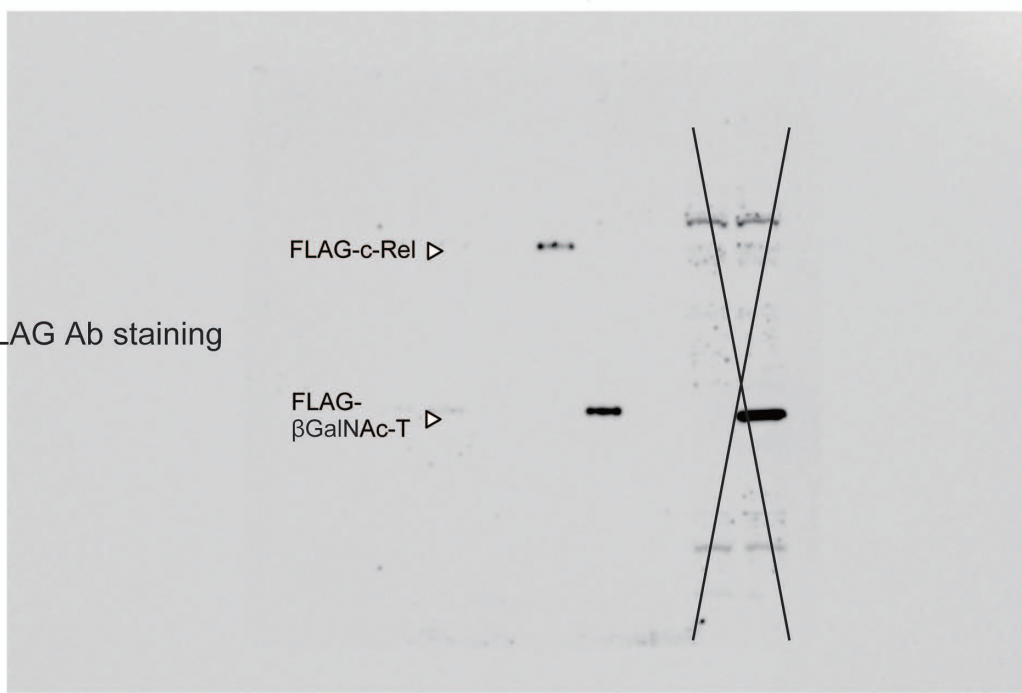

**Fig 2C upper**

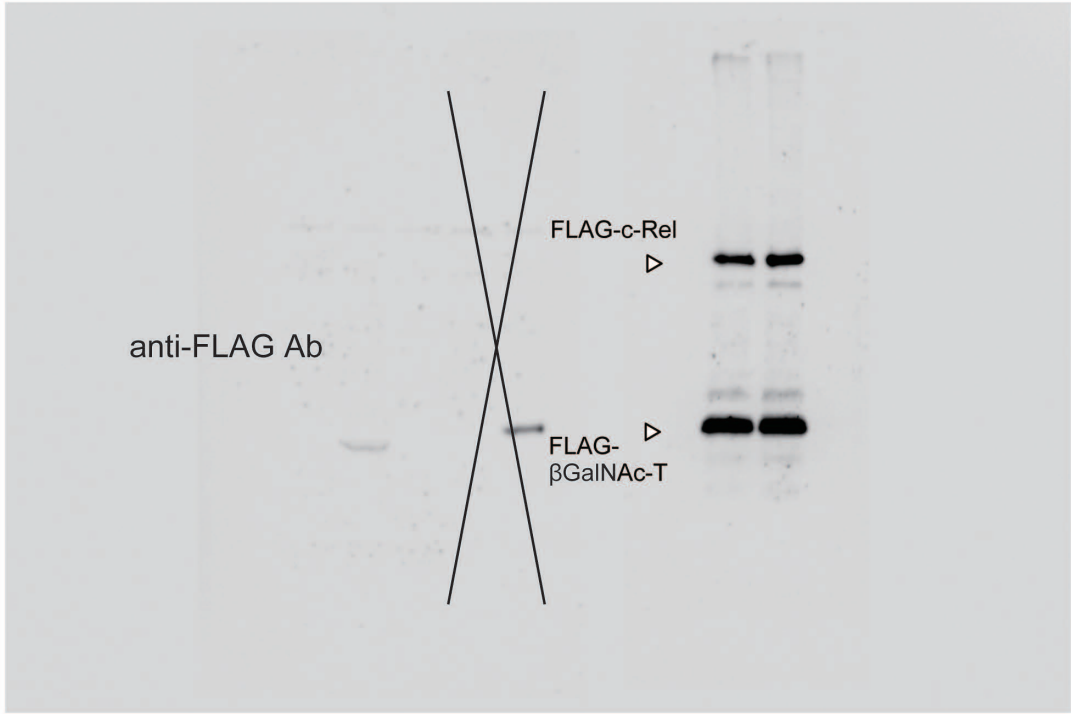

**Fig 2C lower**

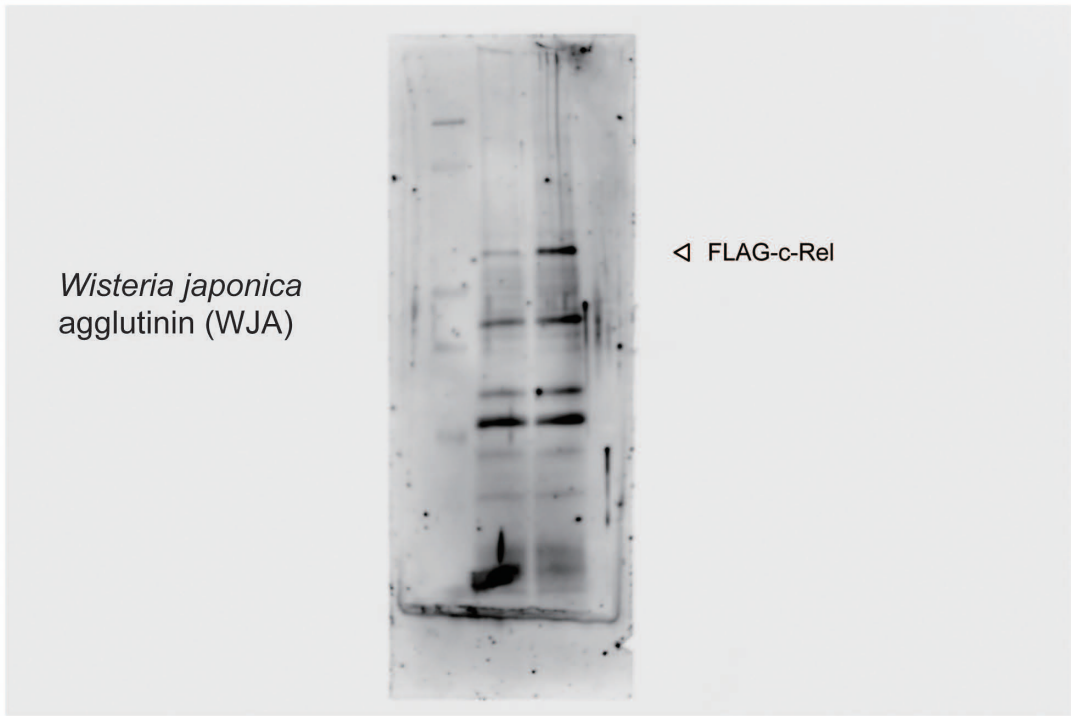

**Fig 3***Wisteria japonica* agglutinin (WJA) staining**Fig 3B middle**FLAG-NLS- $\beta$ 4GalNAc-T  
-transfected HEK293 cell**Fig 3B left**FLAG- $\beta$ 4GalNAc-T  
-transfected HEK293 cell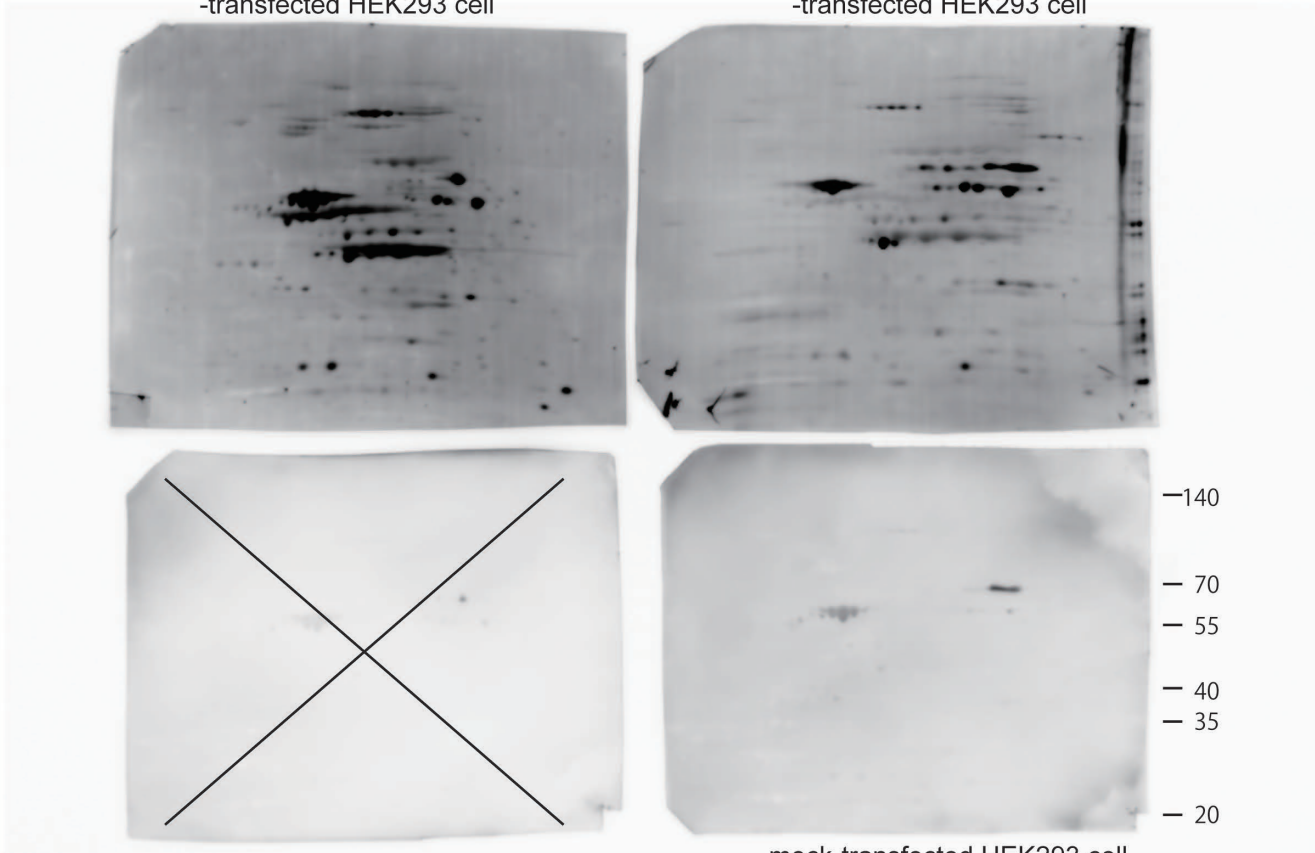

mock-transfected HEK293 cell

**Fig 3B right****Fig 4***Wisteria japonica* agglutinin (WJA) staining**Fig 4 left** embryonic stem cell**Fig 4 right** epiblast-like stem cell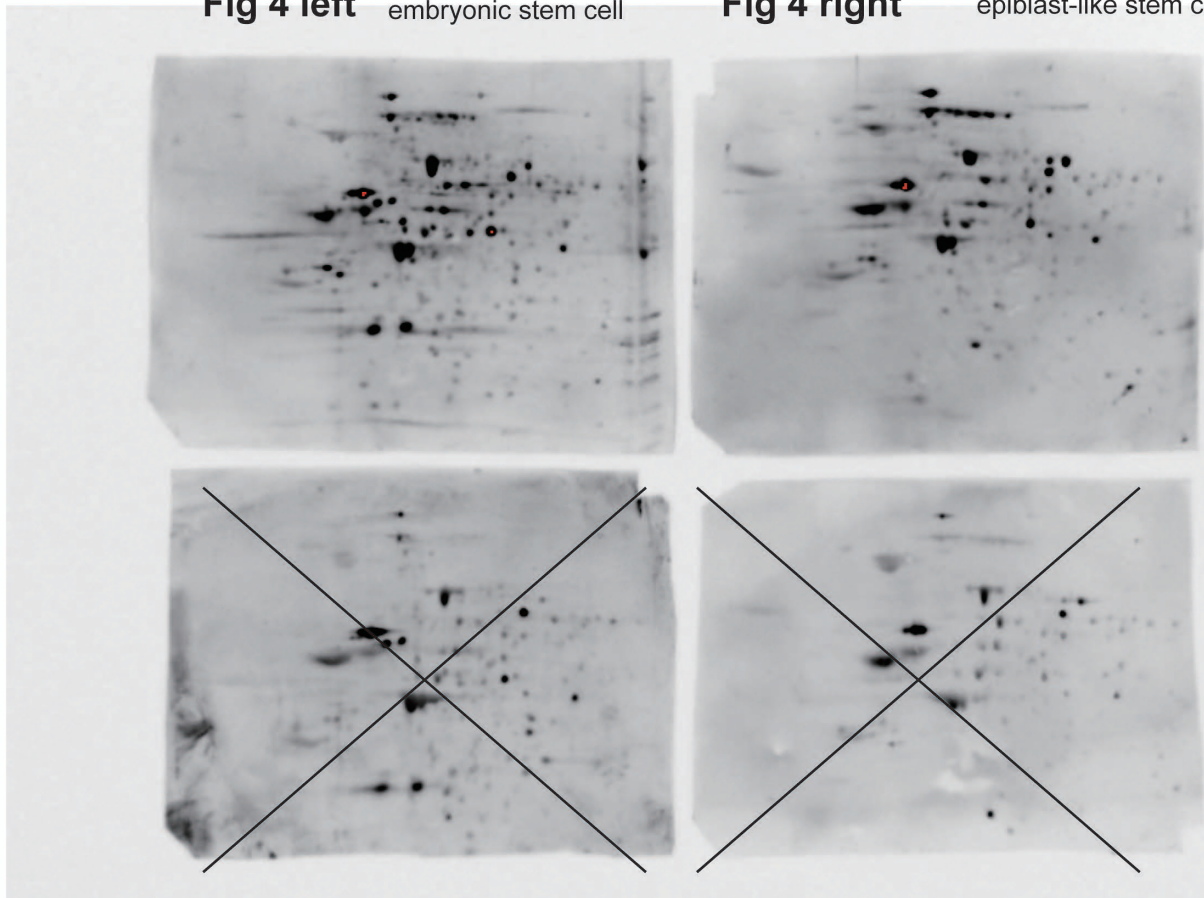

# Fig 5

## Fig 5A

IP: O-GlcNAc Ab  
(RL-2)  
WB: Sox2 Ab

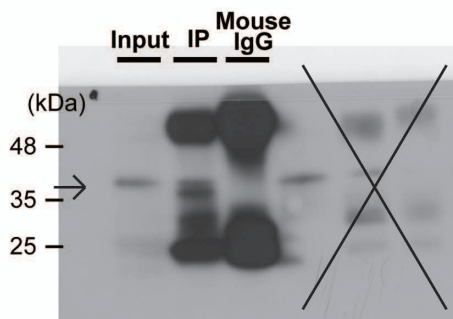

## Fig 5B upper

IP: Sox2 Ab  
WB: Sox2 Ab  
(long exposure of Fig 5A)

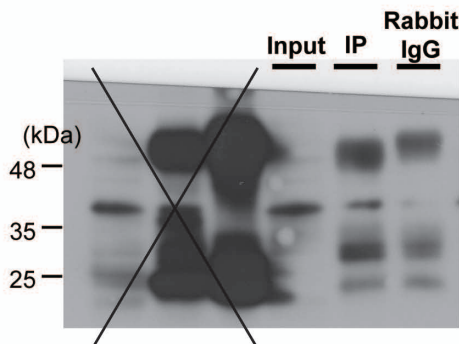

## Fig 5B lower

IP: Sox2 Ab  
WB: O-GlcNAc Ab  
(RL-2)

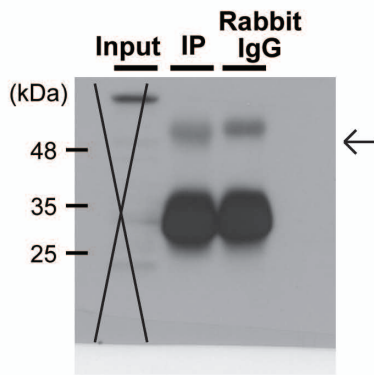

Fig 5C upper

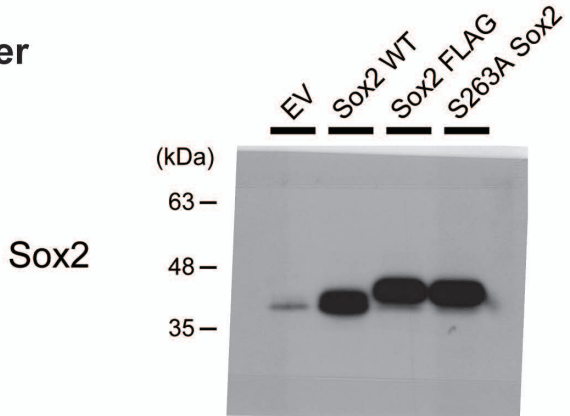

Fig 5C middle

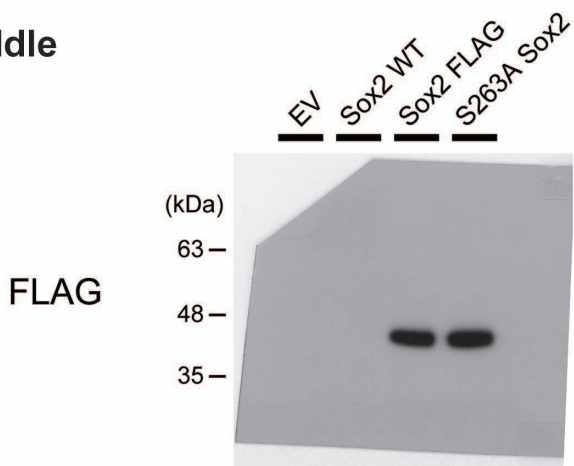

Fig 5C lower

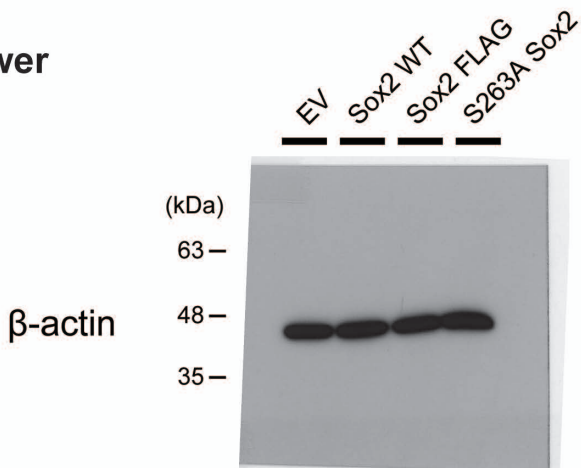

48 —

35 —

**Fig 5D upper**

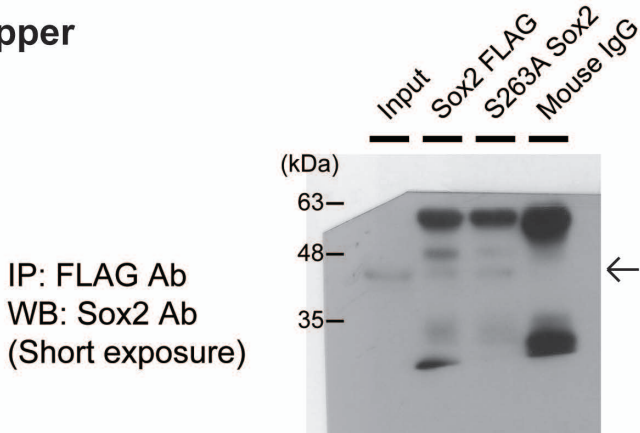

**Fig 5D middle**

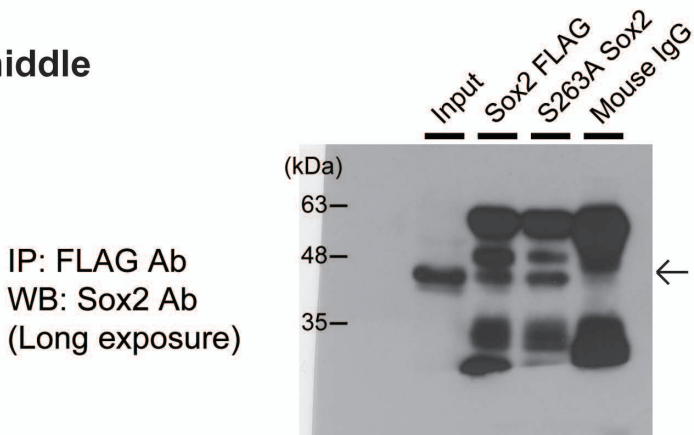

**Fig 5D lower**

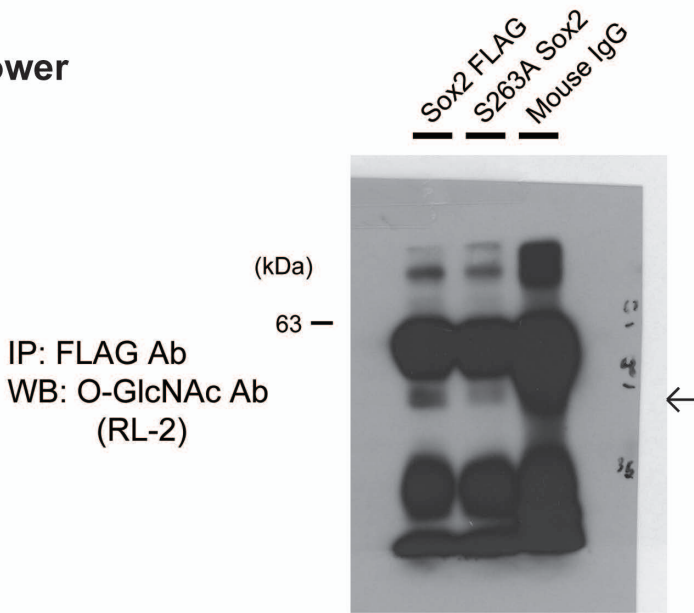

Supplement: pone.0267804.s002.pdf [file pone.0267804.s002.pdf]
